# Supplementary material for: The Mo catalyzed graphitization of amorphous carbon: an in situ TEM study
Source: Royal Society of Chemistry journal article supplement (doi:10.1039/c9ra05936a), 2019-01-01
Supplement: c9ra05936a3.pdf [file c9ra05936a3.pdf]

## Supplementary information

### *Mo catalyzed graphitization of amorphous carbon: An In situ TEM study*

Subash Sharma, <sup>\*a</sup> Balaram Paudel Jaisi <sup>a</sup>, Mona Ibrahim Araby <sup>a</sup>, Sahar Elnobi <sup>a</sup>, Muhammed Emre Ayhan <sup>b</sup>, Golap Kalita <sup>a</sup>, Masaki Tanemura<sup>\* a</sup>

<sup>a</sup> Department of Physical Science and Engineering, Nagoya Institute of Technology Gokiso-cho, Showa-ku, Nagoya 466-8555, Japan

<sup>b</sup> Faculty of Engineering and Architecture, Department of Metallurgical and Materials Engineering, Necmettin Erbakan University, Konya, Turkey

### \* Corresponding Authors

E-mail address: [sharma.subash@nitech.ac.jp](mailto:sharma.subash@nitech.ac.jp) (SS), [tanemura.masaki@nitech.ac.jp](mailto:tanemura.masaki@nitech.ac.jp) (MT)

### Section 1: Electrical measurement setup for in situ Experiments

All the In situ experiments were carried out using Transmission electron microscope (JEM ARM 200F) as shown in Figure S1(a). Specialized TEM holder EM-Z13200TSCOH from JEOL, was used. In this holder, piezo-controlled W STM probe from unisoku scientific instruments was used for electrical measurement. W probe and sample with Mo-CNF were arranged facing each other as shown in Fig S1(b). Electrical measurements were carried out using Agilent precision source/ Measure unit (B2912A) (Fig S1(d)). As shown by the schematic Fig S1(e), during In situ experiment, W probe is brought in the contact the Mo-CNF. Regulated DC power supply PMC160-0.4A (kikusui corp.) (Fig S1(c)) is used for controlling the piezo system.

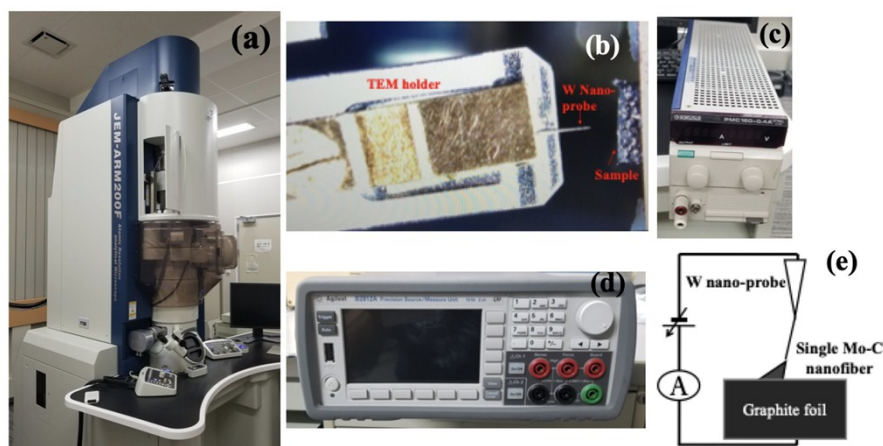

Figure S1 (a) TEM JEM ARM 200F used in this study. (b) Fig showing arrangement of W probe and sample on In situ TEM holder. (c) Regulated DC power supply for controlling piezo electric system (d) Agilent precision source/ Measure unit for supplying bias voltage (e) Schematics showing in situ experiment setup.

## Section 2: EDS measurement of the detached graphitic structure

To study if W is found in the graphitized CNF, graphitized CNF was detached from the probe and EDS measurement was carried out. Almost no W atoms was found confirming no significant movement from W probe to the graphitized structure as shown in Figure S2 below.

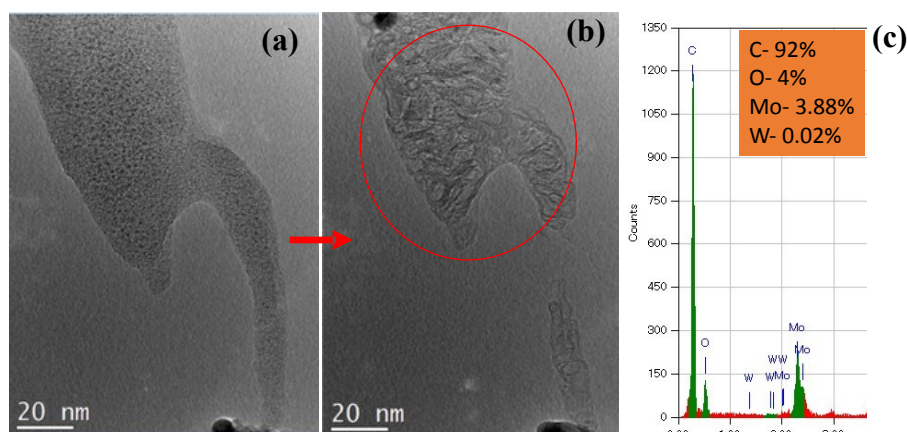

Figure S2: (a) Mo-CNF converted to (b) graphitic structure under application of bias. (c) EDS measurement taken around the circled area of Fig (b) showing almost no presence of

W.
